# Supplementary material
Source: HighWire-hosted journal article supplement (https://bmjopen.bmj.com/content/10/6/e034247)
Supplement: inline-supplementary-material-1 [file inline-supplementary-material-1.pdf]

**ONLINE SUPPLEMENTARY MATERIAL****Racial and socioeconomic disparities in patient experience of clinician empathy:  
a protocol for systematic review and meta-analysis**

Brian W. Roberts, MD, MSc; Christian J. Trzeciak; Nitin K. Puri, MD;  
Anthony J. Mazzairelli, MD, JD, MBE; and Stephen Trzeciak, MD, MPH

From Cooper University Health Care and the Center for Humanism at Cooper Medical School  
of Rowan University, Camden, New Jersey, USA

For submission to *BMJ Open*

Address for correspondence:

Brian W. Roberts, MD, MSc  
Cooper University Hospital  
One Cooper Plaza, K152  
Camden, New Jersey, USA 08103  
[roberts-brian-w@cooperhealth.edu](mailto:roberts-brian-w@cooperhealth.edu)

# Online Supplementary Material 1: The Consultation and Relational Empathy (CARE) measure. Source: <http://www.caremeasure.org/CAREEng.pdf>

**CARE Patient Feedback Measure for**

\*\*\* Type name of Practitioner here \*\*\*

Please write today's date here:

/   /    
D D M M Y Y

**Please rate the following statements about today's consultation.**

Please mark the box like this ☒ with a ball point pen. If you change your mind just cross out your old response and make your new choice. Please answer every statement.

| How good was the practitioner at...                                                                                                                                             | Poor                     | Fair                     | Good                     | Very Good                | Excellent                | Does not apply           |
|---------------------------------------------------------------------------------------------------------------------------------------------------------------------------------|--------------------------|--------------------------|--------------------------|--------------------------|--------------------------|--------------------------|
| <b>1) Making you feel at ease</b><br>(introducing him/herself, explaining his/her position, being friendly and warm towards you, treating you with respect; not cold or abrupt) | <input type="checkbox"/> | <input type="checkbox"/> | <input type="checkbox"/> | <input type="checkbox"/> | <input type="checkbox"/> | <input type="checkbox"/> |
| <b>2) Letting you tell your "story"</b><br>(giving you time to fully describe your condition in your own words; not interrupting, rushing or diverting you)                     | <input type="checkbox"/> | <input type="checkbox"/> | <input type="checkbox"/> | <input type="checkbox"/> | <input type="checkbox"/> | <input type="checkbox"/> |
| <b>3) Really listening</b><br>(paying close attention to what you were saying; not looking at the notes or computer as you were talking)                                        | <input type="checkbox"/> | <input type="checkbox"/> | <input type="checkbox"/> | <input type="checkbox"/> | <input type="checkbox"/> | <input type="checkbox"/> |
| <b>4) Being interested in you as a whole person</b><br>(asking/knowing relevant details about your life, your situation; not treating you as "just a number")                   | <input type="checkbox"/> | <input type="checkbox"/> | <input type="checkbox"/> | <input type="checkbox"/> | <input type="checkbox"/> | <input type="checkbox"/> |
| <b>5) Fully understanding your concerns</b><br>(communicating that he/she had accurately understood your concerns and anxieties; not overlooking or dismissing anything)        | <input type="checkbox"/> | <input type="checkbox"/> | <input type="checkbox"/> | <input type="checkbox"/> | <input type="checkbox"/> | <input type="checkbox"/> |
| <b>6) Showing care and compassion</b><br>(seeming genuinely concerned, connecting with you on a human level; not being indifferent or "detached")                               | <input type="checkbox"/> | <input type="checkbox"/> | <input type="checkbox"/> | <input type="checkbox"/> | <input type="checkbox"/> | <input type="checkbox"/> |
| <b>7) Being positive</b><br>(having a positive approach and a positive attitude; being honest but not negative about your problems)                                             | <input type="checkbox"/> | <input type="checkbox"/> | <input type="checkbox"/> | <input type="checkbox"/> | <input type="checkbox"/> | <input type="checkbox"/> |
| <b>8) Explaining things clearly</b><br>(fully answering your questions; explaining clearly, giving you adequate information; not being vague)                                   | <input type="checkbox"/> | <input type="checkbox"/> | <input type="checkbox"/> | <input type="checkbox"/> | <input type="checkbox"/> | <input type="checkbox"/> |
| <b>9) Helping you to take control</b><br>(exploring with you what you can do to improve your health yourself; encouraging rather than "lecturing" you)                          | <input type="checkbox"/> | <input type="checkbox"/> | <input type="checkbox"/> | <input type="checkbox"/> | <input type="checkbox"/> | <input type="checkbox"/> |
| <b>10) Making a plan of action with you</b><br>(discussing the options, involving you in decisions as much as you want to be involved; not ignoring your views)                 | <input type="checkbox"/> | <input type="checkbox"/> | <input type="checkbox"/> | <input type="checkbox"/> | <input type="checkbox"/> | <input type="checkbox"/> |

**Comments:** If you would like to add further comments on this consultation, please do so here.

## Online Supplementary Material 2: The PRISMA-P checklist

**PRISMA-P (Preferred Reporting Items for Systematic review and Meta-Analysis Protocols) 2015 checklist: recommended items to address in a systematic review protocol\***

| Section and topic                  | Item No | Checklist item                                                                                                                                                                                                                                      | (Page No.#)                    |
|------------------------------------|---------|-----------------------------------------------------------------------------------------------------------------------------------------------------------------------------------------------------------------------------------------------------|--------------------------------|
| ADMINISTRATIVE INFORMATION         |         |                                                                                                                                                                                                                                                     |                                |
| Title:                             |         |                                                                                                                                                                                                                                                     |                                |
| Identification                     | 1a      | Identify the report as a protocol of a systematic review                                                                                                                                                                                            | 1                              |
| Update                             | 1b      | If the protocol is for an update of a previous systematic review, identify as such                                                                                                                                                                  | 7                              |
| Registration                       | 2       | If registered, provide the name of the registry (such as PROSPERO) and registration number                                                                                                                                                          | 2                              |
| Authors:                           |         |                                                                                                                                                                                                                                                     |                                |
| Contact                            | 3a      | Provide name, institutional affiliation, e-mail address of all protocol authors; provide physical mailing address of corresponding author                                                                                                           | 1                              |
| Contributions                      | 3b      | Describe contributions of protocol authors and identify the guarantor of the review                                                                                                                                                                 | 22                             |
| Amendments                         | 4       | If the protocol represents an amendment of a previously completed or published protocol, identify as such and list changes; otherwise, state plan for documenting important protocol amendments                                                     | 11                             |
| Support:                           |         |                                                                                                                                                                                                                                                     |                                |
| Sources                            | 5a      | Indicate sources of financial or other support for the review                                                                                                                                                                                       | 22                             |
| Sponsor                            | 5b      | Provide name for the review funder and/or sponsor                                                                                                                                                                                                   |                                |
| Role of sponsor or funder          | 5c      | Describe roles of funder(s), sponsor(s), and/or institution(s), if any, in developing the protocol                                                                                                                                                  |                                |
| INTRODUCTION                       |         |                                                                                                                                                                                                                                                     |                                |
| Rationale                          | 6       | Describe the rationale for the review in the context of what is already known                                                                                                                                                                       | 4-5                            |
| Objectives                         | 7       | Provide an explicit statement of the question(s) the review will address with reference to participants, interventions, comparators, and outcomes (PICO)                                                                                            | 5                              |
| METHODS                            |         |                                                                                                                                                                                                                                                     |                                |
| Eligibility criteria               | 8       | Specify the study characteristics (such as PICO, study design, setting, time frame) and report characteristics (such as years considered, language, publication status) to be used as criteria for eligibility for the review                       | 8                              |
| Information sources                | 9       | Describe all intended information sources (such as electronic databases, contact with study authors, trial registers or other grey literature sources) with planned dates of coverage                                                               | 7-8                            |
| Search strategy                    | 10      | Present draft of search strategy to be used for at least one electronic database, including planned limits, such that it could be repeated                                                                                                          | 23                             |
| Study records:                     |         |                                                                                                                                                                                                                                                     |                                |
| Data management                    | 11a     | Describe the mechanism(s) that will be used to manage records and data throughout the review                                                                                                                                                        | 9                              |
| Selection process                  | 11b     | State the process that will be used for selecting studies (such as two independent reviewers) through each phase of the review (that is, screening, eligibility and inclusion in meta-analysis)                                                     | 9                              |
| Data collection process            | 11c     | Describe planned method of extracting data from reports (such as piloting forms, done independently, in duplicate), any processes for obtaining and confirming data from investigators                                                              | 9                              |
| Data items                         | 12      | List and define all variables for which data will be sought (such as PICO items, funding sources), any pre-planned data assumptions and simplifications                                                                                             | 9-10                           |
| Outcomes and prioritization        | 13      | List and define all outcomes for which data will be sought, including prioritization of main and additional outcomes, with rationale                                                                                                                | 5, 10                          |
| Risk of bias in individual studies | 14      | Describe anticipated methods for assessing risk of bias of individual studies, including whether this will be done at the outcome or study level, or both; state how this information will be used in data synthesis                                | 9-10                           |
| Data synthesis                     | 15a     | Describe criteria under which study data will be quantitatively synthesised                                                                                                                                                                         | 10-11                          |
|                                    | 15b     | If data are appropriate for quantitative synthesis, describe planned summary measures, methods of handling data and methods of combining data from studies, including any planned exploration of consistency (such as I <sup>2</sup> , Kendall's τ) |                                |
|                                    | 15c     | Describe any proposed additional analyses (such as sensitivity or subgroup analyses, meta-regression)                                                                                                                                               |                                |
|                                    | 15d     | If quantitative synthesis is not appropriate, describe the type of summary planned                                                                                                                                                                  |                                |
| Meta-bias(es)                      | 16      | Specify any planned assessment of meta-bias(es) (such as publication bias across studies, selective reporting within studies)                                                                                                                       | 11                             |
| Confidence in cumulative evidence  | 17      | Describe how the strength of the body of evidence will be assessed (such as GRADE)                                                                                                                                                                  | N/A – not testing intervention |

**\* It is strongly recommended that this checklist be read in conjunction with the PRISMA-P Explanation and Elaboration (cite when available) for important clarification on the items. Amendments to a review protocol should be tracked and dated. The copyright for PRISMA-P (including checklist) is held by the PRISMA-P Group and is distributed under a Creative Commons Attribution Licence 4.0.**

From: Shamseer L, Moher D, Clarke M, Ghersi D, Liberati A, Petticrew M, Shekelle P, Stewart L, PRISMA-P Group. Preferred reporting items for systematic review and meta-analysis protocols (PRISMA-P) 2015: elaboration and explanation. *BMJ*. 2015 Jan 2;349(jan02 1):g7647.
